# Supplementary material for: Team-training in healthcare: a narrative synthesis of the literature
Source: PubMed Central journal article supplement — BMJ Qual Saf. 2014 Feb 5;23(5):359–72. doi: 10.1136/bmjqs-2013-001848 (PMC3995248; doi:10.1136/bmjqs-2013-001848), 2014-02-05
Supplement: bmjqs-2013-001848-s1.pdf [file bmjqs-2013-001848-s1.pdf]

**Appendix.**

Evidence Summary Table.

|                              | Study Characteristics |         |             | Levels of Evaluation |                                                                                                 |                                                                                                                                                                                                                                           |                                                                                                                                                                                                                                                                                                                                                                                                                                                                                                                                                                             |
|------------------------------|-----------------------|---------|-------------|----------------------|-------------------------------------------------------------------------------------------------|-------------------------------------------------------------------------------------------------------------------------------------------------------------------------------------------------------------------------------------------|-----------------------------------------------------------------------------------------------------------------------------------------------------------------------------------------------------------------------------------------------------------------------------------------------------------------------------------------------------------------------------------------------------------------------------------------------------------------------------------------------------------------------------------------------------------------------------|
|                              | Curriculum            | Setting | Design      | Trainee Reactions    | Knowledge, Self-Efficacy, or Attitudes                                                          | Team Behavior, Process, or Emergent State (e.g., teamwork climate or trust)                                                                                                                                                               | Clinical Processes or Patient Outcomes                                                                                                                                                                                                                                                                                                                                                                                                                                                                                                                                      |
| Andreatta 2011 <sup>41</sup> | OBEMAN                | OB      | Descriptive |                      |                                                                                                 |                                                                                                                                                                                                                                           | <ul style="list-style-type: none"> <li>• 5 types of incongruent hospital policies or procedures governing clinical practice identified</li> </ul>                                                                                                                                                                                                                                                                                                                                                                                                                           |
| Armour 2011 <sup>42</sup>    | TS                    | OR      | Time series |                      | <ul style="list-style-type: none"> <li>• No significant change in teamwork knowledge</li> </ul> | <ul style="list-style-type: none"> <li>• Perceptions of OR teamwork, communication, and overall team skills significantly improved*</li> <li>• Perceptions of PACU teamwork improved and PACU communication declined slightly+</li> </ul> | <ul style="list-style-type: none"> <li>• Significant reduction in surgical morbidity (20.2% vs. 11%*) and mortality (2.7% vs. 1%*) following training</li> <li>• Significant improvement in 4 of 6 SQIP measures*</li> <li>• Room turnover time decreased significantly (43 vs. 35.5 minutes*)</li> <li>• Percentage of on-time first case starts improved (69% to 81%+)</li> <li>• Patient willingness to recommend significantly improved (77% to 89.3%*)</li> <li>• Evidence of some decay over one year post-training follow-up for mortality, morbidity, on</li> </ul> |

|                            |                                 |                                             |           |                                                                                                          |  |                                                                                                                                                                                                                                                                                                       |                                                                     |
|----------------------------|---------------------------------|---------------------------------------------|-----------|----------------------------------------------------------------------------------------------------------|--|-------------------------------------------------------------------------------------------------------------------------------------------------------------------------------------------------------------------------------------------------------------------------------------------------------|---------------------------------------------------------------------|
|                            |                                 |                                             |           |                                                                                                          |  |                                                                                                                                                                                                                                                                                                       | time starts, and patient satisfaction, while SQIP remained improved |
| Carney 2011 <sup>69</sup>  | VA MTT                          | OR                                          | Pre-Post  |                                                                                                          |  | <ul style="list-style-type: none"> <li>Physicians significantly improved on all 6 teamwork climate items*; nurses significantly improved on 5 of 6 items*; physicians remained significantly more positive regarding teamwork climate compared to nurses post training</li> </ul>                     |                                                                     |
| Castner 2012 <sup>85</sup> | TS                              | Multiple work areas in acute care hospitals | NCGPT     |                                                                                                          |  | <ul style="list-style-type: none"> <li>2 months post-training, 4 of 5 dimensions of teamwork were rated as accepted by 80% or more of respondents</li> <li>1 of 5 dimensions of teamwork (leadership) was perceived more positively by training participants compared to non-participants*</li> </ul> |                                                                     |
| Cooper 2011 <sup>53</sup>  | Safety Leadership Team-Training | Hospital management groups                  | Post only | <ul style="list-style-type: none"> <li>82% or more reported training was relevant and of high</li> </ul> |  | <ul style="list-style-type: none"> <li>Qualitative comments of participants suggested self-reflection regarding</li> </ul>                                                                                                                                                                            |                                                                     |

|                             |    |                         |             | quality                                                                     |                                                                                                                                                            | leadership, communication, and other leadership processes in line with scenario objectives                                                                     |                                                                                                                                                                                                                                                                                                                                                                                                                                                                                                                                                        |
|-----------------------------|----|-------------------------|-------------|-----------------------------------------------------------------------------|------------------------------------------------------------------------------------------------------------------------------------------------------------|----------------------------------------------------------------------------------------------------------------------------------------------------------------|--------------------------------------------------------------------------------------------------------------------------------------------------------------------------------------------------------------------------------------------------------------------------------------------------------------------------------------------------------------------------------------------------------------------------------------------------------------------------------------------------------------------------------------------------------|
| Deering 2011 <sup>39</sup>  | TS | Combat support hospital | Pre-post    |                                                                             |                                                                                                                                                            |                                                                                                                                                                | <ul style="list-style-type: none"> <li>• Decreased number of adverse events (22.2 vs. 18.2 events<sup>†</sup>)</li> <li>• 83% decrease in medication and transfusion errors (7.1 vs. 1.2*)</li> <li>• 70% decrease in needlestick injury and exposures (4.0 vs. 1.2*)</li> <li>• 65% decrease in rate of incidents coded as having communication as likely mitigating factor post training (5.2 vs. 1.8*)</li> <li>• No significant decrease in rate of incidents coded as having 3 other teamwork competencies as likely mitigating factor</li> </ul> |
| Figueroa 2012 <sup>65</sup> | TS | ICU                     | Time series | <ul style="list-style-type: none"> <li>• 79% found course useful</li> </ul> | <ul style="list-style-type: none"> <li>• Confidence in both leadership and clinical management skills significantly increased immediately after</li> </ul> | <ul style="list-style-type: none"> <li>• Use of closed-loop communication, huddles/debriefs, mutual respect, and empowerment significantly improved</li> </ul> |                                                                                                                                                                                                                                                                                                                                                                                                                                                                                                                                                        |

|                            |                                  |     |             |                                                                                                          |                                                                                                                                                    |                                                                                                                                                                                                                                                                                                                                                                         |                                                                                                                                                                                           |
|----------------------------|----------------------------------|-----|-------------|----------------------------------------------------------------------------------------------------------|----------------------------------------------------------------------------------------------------------------------------------------------------|-------------------------------------------------------------------------------------------------------------------------------------------------------------------------------------------------------------------------------------------------------------------------------------------------------------------------------------------------------------------------|-------------------------------------------------------------------------------------------------------------------------------------------------------------------------------------------|
|                            |                                  |     |             |                                                                                                          | training and were sustained at 3 month post evaluation*                                                                                            | immediately after training and improvements were sustained at 3 month post evaluation*                                                                                                                                                                                                                                                                                  |                                                                                                                                                                                           |
| Fransen 2012 <sup>43</sup> | Multi-disciplinary team training | OB  | Cluster RCT |                                                                                                          |                                                                                                                                                    | <ul style="list-style-type: none"> <li>• Trained teams performed significantly better in communication* and decision making* compared to non-trained teams</li> <li>• Trained teams performed slightly better on situational awareness/resource management and role responsibility<sup>+</sup></li> <li>• No significant differences in patient friendliness</li> </ul> | <ul style="list-style-type: none"> <li>• Trained teams adhered to predefined obstetric procedures more frequently than non-trained teams (83% vs. 46%*)</li> </ul>                        |
| Fregley 2011 <sup>86</sup> | CRM                              | ICU | NCGPPT      | <ul style="list-style-type: none"> <li>• Rated course as highly relevant to clinical practice</li> </ul> | <ul style="list-style-type: none"> <li>• Participant survey indicated increased confidence in both similar and general emergency events</li> </ul> | <ul style="list-style-type: none"> <li>• Overall observed teamwork, leadership and coordination, and verbalizing situational information significantly improved in post-training simulations*</li> <li>• No significant change in mutual performance</li> </ul>                                                                                                         | <ul style="list-style-type: none"> <li>• Regardless of modality that clinical management skills were also taught, all participating teams improved clinical management scores*</li> </ul> |

|                                  |                                            |              |                                          |                                                                                                                                                                                                                  |  |                                                                                                                                                                                                                          |                                                                                                                                                      |
|----------------------------------|--------------------------------------------|--------------|------------------------------------------|------------------------------------------------------------------------------------------------------------------------------------------------------------------------------------------------------------------|--|--------------------------------------------------------------------------------------------------------------------------------------------------------------------------------------------------------------------------|------------------------------------------------------------------------------------------------------------------------------------------------------|
|                                  |                                            |              |                                          |                                                                                                                                                                                                                  |  | monitoring<br>observed                                                                                                                                                                                                   |                                                                                                                                                      |
| Heard<br>2011 <sup>87</sup>      | CRM                                        | Endoscopy    | Time series                              | <ul style="list-style-type: none"> <li>Perceived training to be useful, enjoyable, applicable, and realistic</li> <li>Participants rated training as helpful in daily practice 1 month after training</li> </ul> |  |                                                                                                                                                                                                                          |                                                                                                                                                      |
| Kirschbaum<br>2012 <sup>88</sup> | Multi-disciplinary physician team training | OR           | Pre-post                                 |                                                                                                                                                                                                                  |  | <ul style="list-style-type: none"> <li>3 of 7 dimensions of the PRIOR survey, a measure of communication related attitudes and practices, improved significantly*</li> </ul>                                             |                                                                                                                                                      |
| Maxson<br>2011 <sup>89</sup>     | TS                                         | Surgery      | Time series                              |                                                                                                                                                                                                                  |  | <ul style="list-style-type: none"> <li>Satisfaction with collaborative clinical decision-making processes significantly improved 2 weeks post training and improvements were maintained at 2 month follow-up*</li> </ul> |                                                                                                                                                      |
| Mayer<br>2011 <sup>35</sup>      | TS                                         | PICU<br>SICU | Longitudinal with non-equivalent control |                                                                                                                                                                                                                  |  | <ul style="list-style-type: none"> <li>All 6 dimensions of observed team performance improved at +1 month*, 3</li> </ul>                                                                                                 | <ul style="list-style-type: none"> <li>Nosocomial infections decreased slightly<sup>+</sup></li> <li>Average time for placing patients on</li> </ul> |

|                               |                                              |        |           |                                                                                                                                  |                                                                                                                                                                                                                  |                                                                                                                                                                                                                                                                                                                                                                                                                                            |                                                                                                                                                                                                               |
|-------------------------------|----------------------------------------------|--------|-----------|----------------------------------------------------------------------------------------------------------------------------------|------------------------------------------------------------------------------------------------------------------------------------------------------------------------------------------------------------------|--------------------------------------------------------------------------------------------------------------------------------------------------------------------------------------------------------------------------------------------------------------------------------------------------------------------------------------------------------------------------------------------------------------------------------------------|---------------------------------------------------------------------------------------------------------------------------------------------------------------------------------------------------------------|
|                               |                                              |        |           |                                                                                                                                  |                                                                                                                                                                                                                  | <p>dimensions remained significantly improved at +6 months, 5 dimensions were significantly improved at +12 month follow-up*</p> <ul style="list-style-type: none"> <li>• Staff perceptions of teamwork within unit significantly improved in SICU, but did not improve in comparison group*</li> <li>• Overall perceptions of safety and communication openness improved significantly in the PICU, SICU, and comparison group</li> </ul> | <p>extracorporeal membrane</p> <ul style="list-style-type: none"> <li>• oxygenation (ECMO) decreased (23 vs. 14 minutes*)</li> <li>• No significant change in length of rapid response team events</li> </ul> |
| McLaughlin 2011 <sup>44</sup> | Intensive Trauma Team Training Course (ITTC) | Trauma | Post-only | <ul style="list-style-type: none"> <li>• 77% felt training covered topics relevant to subsequent clinical experiences</li> </ul> | <ul style="list-style-type: none"> <li>• 84% felt confident applying teamwork skills during deployment</li> <li>• 69% thought team training was an important or very important part of their training</li> </ul> |                                                                                                                                                                                                                                                                                                                                                                                                                                            |                                                                                                                                                                                                               |
| Neily 2011 <sup>38</sup>      | VA MTT                                       | OR     | RCC       |                                                                                                                                  |                                                                                                                                                                                                                  | <ul style="list-style-type: none"> <li>• Qualitative interviews suggested improvements</li> </ul>                                                                                                                                                                                                                                                                                                                                          | <ul style="list-style-type: none"> <li>• 50% greater reduction in risk-adjusted surgical mortality for MTT</li> </ul>                                                                                         |

|                                                      |                                 |              |             |                                                                                                         |                                                                                                                                                                                       |                                                                                                                                                                                                                                                                                                                                                                                |                                                                                                                                                                                                                                                                                                                                                                                                   |
|------------------------------------------------------|---------------------------------|--------------|-------------|---------------------------------------------------------------------------------------------------------|---------------------------------------------------------------------------------------------------------------------------------------------------------------------------------------|--------------------------------------------------------------------------------------------------------------------------------------------------------------------------------------------------------------------------------------------------------------------------------------------------------------------------------------------------------------------------------|---------------------------------------------------------------------------------------------------------------------------------------------------------------------------------------------------------------------------------------------------------------------------------------------------------------------------------------------------------------------------------------------------|
|                                                      |                                 |              |             |                                                                                                         |                                                                                                                                                                                       | communication among OR staff and staff awareness of teamwork concepts                                                                                                                                                                                                                                                                                                          | <p>group vs. control (RR=1.49)*</p> <ul style="list-style-type: none"> <li>• Reduction of 0.5 deaths per 1000 procedures associated with every quarter that teamwork intervention was in place*</li> <li>• Qualitative interviews suggested improvements in overall perioperative efficiency, reduced length of procedures, improved first case on-time start times, and equipment use</li> </ul> |
| Patterson 2013 (published online 2012) <sup>66</sup> | Multidisciplinary team training | Pediatric ED | Time-series | <ul style="list-style-type: none"> <li>• Value of training was rated highly on 5 point scale</li> </ul> | <ul style="list-style-type: none"> <li>• Teamwork knowledge scores significantly increased immediately post intervention and gains were maintained at 8-10month follow-up*</li> </ul> | <ul style="list-style-type: none"> <li>• Safety climate, teamwork climate, and overall SAQ scores increased immediately post intervention and improvements maintained at 8-10 month follow-up*</li> <li>• Observed teamwork behaviors improved significantly and improvements maintained at 8-10 month follow-up*</li> <li>• No significant differences detected in</li> </ul> | <ul style="list-style-type: none"> <li>• Patient safety event rate decreased (2-3 annually pre vs. 1000 days since safety event in 12month post)</li> </ul>                                                                                                                                                                                                                                       |

|                           |                                 |                            |                    |  |  |                                                                                                                                                                                                                                                |                                                                                                                                                                                                                                                                                              |
|---------------------------|---------------------------------|----------------------------|--------------------|--|--|------------------------------------------------------------------------------------------------------------------------------------------------------------------------------------------------------------------------------------------------|----------------------------------------------------------------------------------------------------------------------------------------------------------------------------------------------------------------------------------------------------------------------------------------------|
|                           |                                 |                            |                    |  |  | frequency of observed behavioral markers of teamwork over time                                                                                                                                                                                 |                                                                                                                                                                                                                                                                                              |
| Phipps 2012 <sup>70</sup> | CRM                             | L&D                        | Pre-post           |  |  | <ul style="list-style-type: none"> <li>4 of 7 unit-referenced dimensions of safety culture significantly improved*</li> </ul>                                                                                                                  | <ul style="list-style-type: none"> <li>Decrease in adverse outcome index (AOI) (0.052 pre vs. 0.043 post)</li> <li>No significant change in patient satisfaction</li> </ul>                                                                                                                  |
| Riley 2011 <sup>36</sup>  | TS                              | L&D                        | NCGPPT             |  |  | <ul style="list-style-type: none"> <li>No statistically significant differences in safety culture after Type II error corrections</li> </ul>                                                                                                   | <ul style="list-style-type: none"> <li>Weighted adverse outcome score (WAOS)—an index of perinatal harm—decreased 37% for full intervention group only (1.15 pre vs. 0.72 post*)</li> <li>Variability in WAOS scores was decreased post-training for full intervention group only</li> </ul> |
| Singer 2011 <sup>54</sup> | Safety Leadership Team-Training | Hospital management groups | Qual. Longitudinal |  |  | <ul style="list-style-type: none"> <li>Qualitative interviews with trainee teams indicated improved leadership activation, inter-departmental transparency &amp; learning, information mobilization, &amp; information solicitation</li> </ul> |                                                                                                                                                                                                                                                                                              |
| Steineman                 | CRM                             | Trauma                     | Prospective        |  |  | <ul style="list-style-type: none"> <li>Significant</li> </ul>                                                                                                                                                                                  | <ul style="list-style-type: none"> <li>16% reduction in</li> </ul>                                                                                                                                                                                                                           |



|                               |     |                    |              |                                                                                                                                                                                                                             |                                                                                                                                                                                                 |                                                                                                                                                                                           |                                                                                                                                                                                                                                                                    |
|-------------------------------|-----|--------------------|--------------|-----------------------------------------------------------------------------------------------------------------------------------------------------------------------------------------------------------------------------|-------------------------------------------------------------------------------------------------------------------------------------------------------------------------------------------------|-------------------------------------------------------------------------------------------------------------------------------------------------------------------------------------------|--------------------------------------------------------------------------------------------------------------------------------------------------------------------------------------------------------------------------------------------------------------------|
| n<br>2011 <sup>90</sup>       |     |                    | cohort       |                                                                                                                                                                                                                             |                                                                                                                                                                                                 | improvement in<br>observer rated<br>teamwork during<br>simulated<br>scenarios* and daily<br>clinical practice*                                                                            | average ED<br>resuscitation time* <ul style="list-style-type: none"> <li>• 76% increase in<br/>completeness of<br/>clinical task<br/>completion*</li> <li>• No significant<br/>changes in mean<br/>hospital length of<br/>stay, ICU days, or<br/>deaths</li> </ul> |
| Stevens<br>2012 <sup>71</sup> | CRM | Cardiac<br>surgery | Pre-post     | <ul style="list-style-type: none"> <li>• 80% or more<br/>perceived<br/>training to be<br/>useful,<br/>applicable,<br/>and likely to<br/>positively<br/>change their<br/>practice<br/>during a<br/>critical event</li> </ul> |                                                                                                                                                                                                 | <ul style="list-style-type: none"> <li>• 1 of 10 safety<br/>climate questions<br/>significantly<br/>improved* and 3<br/>others trended<br/>positively at 6<br/>month follow-up</li> </ul> |                                                                                                                                                                                                                                                                    |
| Stocker<br>2012 <sup>91</sup> | CRM | PICU               | Time Series  | <ul style="list-style-type: none"> <li>• 91%<br/>perceived the<br/>training as<br/>effective for<br/>training non-<br/>technical<br/>skills</li> </ul>                                                                      | <ul style="list-style-type: none"> <li>• Significant increase<br/>in confidence<br/>to deal with future<br/>critical events at<br/>both 6month and 12<br/>month follow-up*</li> </ul>           |                                                                                                                                                                                           |                                                                                                                                                                                                                                                                    |
| Tapson<br>2011 <sup>80</sup>  | CRM | Surgery            | Longitudinal |                                                                                                                                                                                                                             | <ul style="list-style-type: none"> <li>• Significant<br/>improvement in 6 of<br/>7 knowledge<br/>questions<br/>immediately post<br/>training*, with<br/>significant<br/>improvements</li> </ul> |                                                                                                                                                                                           | <ul style="list-style-type: none"> <li>• Significantly more<br/>post-training than<br/>pre-training charts<br/>met guideline<br/>recommendations<br/>and standards of care<br/>for timing, inpatient<br/>duration, and</li> </ul>                                  |

|                               |     |                         |                                                             |                                                                                                                                                                       |                                                                                                                                                                                                                                                                                                                                                                        |  |                                          |
|-------------------------------|-----|-------------------------|-------------------------------------------------------------|-----------------------------------------------------------------------------------------------------------------------------------------------------------------------|------------------------------------------------------------------------------------------------------------------------------------------------------------------------------------------------------------------------------------------------------------------------------------------------------------------------------------------------------------------------|--|------------------------------------------|
|                               |     |                         |                                                             |                                                                                                                                                                       | <p>retained for 5 of 7 questions at 30 day follow-up*</p> <ul style="list-style-type: none"> <li>Confidence in ability to identify potentially hazardous processes or conditions*, to use CRM principles*, and in ability to identify patients needing VTE prophylaxis* significantly improved immediately post training and maintained at 30 day follow-up</li> </ul> |  | <p>prophylaxis use beyond discharge*</p> |
| van Schaik 2011 <sup>92</sup> | CRM | Pediatric critical care | Cross-sectional (nursing survey) Pre-post (resident survey) | <ul style="list-style-type: none"> <li>Themes from qualitative comments from participants indicated that the training experience was perceived as valuable</li> </ul> | <ul style="list-style-type: none"> <li>3 of 8 self-efficacy items were significantly higher among participating nurses compared to non-participating nurses*</li> <li>Resident self-efficacy regarding leadership skills, and skills related to identifying when help is needed and asking for help significantly improved*</li> </ul>                                 |  |                                          |
| Volk 2011 <sup>93</sup>       | CRM | OR                      | Post-only                                                   | <ul style="list-style-type: none"> <li>90% or more perceived</li> </ul>                                                                                               |                                                                                                                                                                                                                                                                                                                                                                        |  |                                          |

|                             |        |    |     |                                                                                             |  |  |                                                                                                                                                         |
|-----------------------------|--------|----|-----|---------------------------------------------------------------------------------------------|--|--|---------------------------------------------------------------------------------------------------------------------------------------------------------|
|                             |        |    |     | training as realistic, of high quality, and would have a positive impact on future practice |  |  |                                                                                                                                                         |
| Young-Xu 2011 <sup>58</sup> | VA MTT | OR | RCC |                                                                                             |  |  | <ul style="list-style-type: none"> <li>• 20% greater reduction in risk-adjusted surgical morbidity in the MTT group vs. control (RR = 1.20)*</li> </ul> |

VA MTT= VA Medical Team Training, TS = TeamSTEPPS, CRM = Crew or Crisis Resource Management, OB = Obstetrics, L&D = Labor and Delivery, OR = Operating Room, PICU= Pediatric intensive care unit, SICU = Surgical intensive care unit, Peds = Pediatrics, NCGPT= Non-equivalent comparison group post-test only, NCGPPT = Non-equivalent comparison groups pre-test/post-test, OBEMAN = Obstetrics, Emergency Medicine, Anesthesiology, and Neonatology Program, SBT = Simulation based training, CBT = Case based learning, RCC= Retrospective controlled cohort study, + Improvement, but not statistically significant; \* p < .05
